# Supplementary material for: Identification of Specific Effect of Chloride on the Spectral Properties and Structural Stability of Multiple Extracellular Glutamic Acid Mutants of Bacteriorhodopsin
Source: PLOS journal article supplement (doi:10.1371/journal.pone.0162952), 2016-09-22
Supplement: S8 (10.1371/journal.pone.0162952.s008) [file journal.pone.0162952.s008]

**S1Table.** The details of performed MD simulations

|                       |                                 |                                                                                         |
|-----------------------|---------------------------------|-----------------------------------------------------------------------------------------|
| Set No.               | 1                               | 2                                                                                       |
| Protein variants      | WT and 3GLU                     | WT, 2GLU and 3GLU                                                                       |
| Goal                  | Investigation of ion entry path | Determination of the ability of the protein to hold the ion in a predetermined position |
| Time [ns]             | 150                             | 100                                                                                     |
| C <sub>NaCl</sub> [M] | 2                               | 0.15                                                                                    |
